# Supplementary material for: Infrared and Raman spectra, conformational stability, vibrational assignment, ab initio calculations and r0 structural parameters for N-methylpropargyl amineElectronic supplementary information (ESI) available: IR and Raman assignments (Table 1S), symmetry coordinates (Table 2S), and internal coordinates of N-methylpropargyl amine (Fig. 1S). See http://www.rsc.org/suppdata/cp/b1/b109222g/
Source: Royal Society of Chemistry journal article supplement (doi:10.1039/b109222g), 2002-03-19
Supplement: table2s.doc [file table2s.doc]

**Table 2S.** Symmetry coordinatesa for vibrations of N-methylpropargyl amine.

| Description | Symmetry Coordinate |
| --- | --- |
| N-H stretch | S1 = r4 |
| C-H stretch | S2 = r1 |
| CH3 antisym stretch | S3 = r5 – r7 |
| CH3 antisym stretch | S4 = 2r6 – r5 – r7 |
| CH2 antisym stretch | S5 = r2 – r3 |
| CH2 sym stretch | S6 = r2 + r3 |
| CH3 sym stretch | S7 = r5 + r6 + r7 |
| CC stretch | S8 = S |
| CH3 antisym deformation | S9 = 25 – 6 – 7 |
| CH3 antisym deformation | S10 = 6 – 7 |
| CH2 sciss | S11 = (6+2) – 2 – 3 – 2 – 3 – (6–2) |
| N-H bend | S12 =  |
| CH3 sym deformation | S13 = 5 + 6 + 7 – 5 – 6 – 7 |
| CH2 wag | S14 = 2 + 3 – 2 – 3 |
| CH2 twist | S15 = 2 – 3 – 2 + 3 |
| CH3 rock | S16 = 5 – 6 |
| CH3 rock | S17 = 27 – 5 – 6 |
| CNC stretch | S18 = U – V |
| CH2 rock | S19 = 2 – 3 + 2 – 3 |
| CNC stretch | S20 = U + V |
| C-C stretch | S21 = T |
| N-H wag op | S22 = 4 + 4 |
| CC-H bend ip | S23 =  |
| CC-H bend op | S24 =  |
| NCC bend | S25 = (6+2) – 2 – 3 – 2 – 3 – (6–2) |
| CNC bend | S26 =  |
| CC-C bend op | S27 =  |
| CH3 torsion | S28 = 1 |
| CC-C bend ip | S29 =  |
| CCNC torsion | S30 = 2 |

a. Not normalized.
